# Supplementary material for: Vascular Calcification and the Gut and Blood Microbiome in Chronic Kidney Disease Patients on Peritoneal Dialysis: A Pilot Study
Source: MDPI journal article supplement (doi:10.3390/biom12070867), 2022-06-21
Supplement: s1 [file s1]

# Vascular Calcification and the Gut and Blood Microbiome in Chronic Kidney Disease Patients on Peritoneal Dialysis: A Pilot Study

Ana Merino-Ribas <sup>1,2,3</sup>, Ricardo Araujo <sup>1</sup>, Luciano Pereira <sup>1,4</sup>, Joana Campos <sup>1</sup>, Luísa Barreiros <sup>5</sup>, Marcela A. Segundo <sup>5</sup>, Nádia Silva <sup>4</sup>, Carolina F. F. A. Costa <sup>1,6</sup>, Janete Quelhas-Santos <sup>7</sup>, Fábio Trindade <sup>7</sup>, Inês Falcão-Pires <sup>7</sup>, Ines Alencastre <sup>1</sup>, Ioana Bancu Dumitrescu <sup>2,8</sup> and Benedita Sampaio-Maia <sup>1,9,\*</sup>

- <sup>1</sup> Nephrology & Infectious Diseases R & D Group, i3S—Instituto de Investigação e Inovação em Saúde, INEB—Instituto de Engenharia Biomédica, Universidade do Porto, 4200-135 Porto, Portugal; anamerinoribas@gmail.com (A.M.-R.); ricardo.araujo@i3s.up.pt (R.A.); lucianoarturpereira@hotmail.com (L.P.); joanaaraujocampos@gmail.com (J.C.); carolina.costa@i3s.up.pt (C.F.F.A.C.); ines.alencastre@ineb.up.pt (I.A.)
- <sup>2</sup> Departament de Medicina, Universitat Autònoma de Barcelona, 08035 Barcelona, Spain; ioana\_bancu@yahoo.com
- <sup>3</sup> Nephrology Department, Hospital Universitari de Girona Doctor Josep Trueta, 17007 Girona, Spain
- <sup>4</sup> Nephrology Department, Centro Hospitalar Universitário de São João, 4200-319 Porto, Portugal; nadiaraquel77@gmail.com
- <sup>5</sup> LAQV, REQUIMTE, Departamento de Ciências Químicas, Faculdade de Farmácia, Universidade do Porto, 4050-313 Porto, Portugal; lbarreiros78@gmail.com (L.B.); msegundo@ff.up.pt (M.A.S.)
- <sup>6</sup> Instituto de Ciências Biomédicas Abel Salazar, Universidade do Porto, 4050-313 Porto, Portugal
- <sup>7</sup> UnIC@RISE- Cardiovascular Research and Development Centre, Department of Surgery and Physiology, Faculty of Medicine, University of Porto, 4200-319 Porto, Portugal; sjanete@med.up.pt (J.Q.-S.); ftrindade@med.up.pt (F.T.); ipires@med.up.pt (I.F.-P.)
- <sup>8</sup> Fresenius Nephrocare, 110372 Pitesti, Romania
- <sup>9</sup> Faculdade de Medicina Dentária, Universidade do Porto, 4200-393 Porto, Portugal
- \* Correspondence: bmaia@fmd.up.pt; Tel.: +351-220-901-100

A

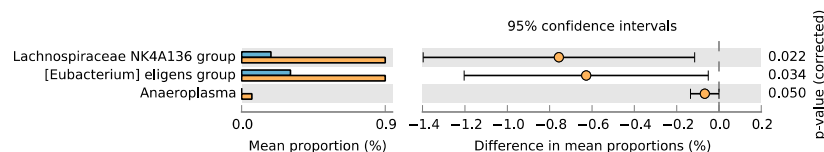

B

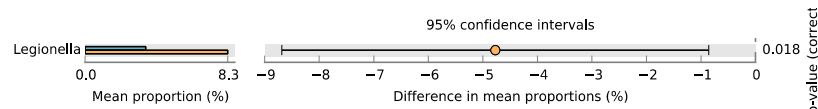

**Figure S1.** Relative changes of gut (A) or blood (B) bacterial taxa at the genus/family level in chronic kidney disease patients on peritoneal dialysis comparing male (yellow bars) with female (blue bars) patients.

**A**

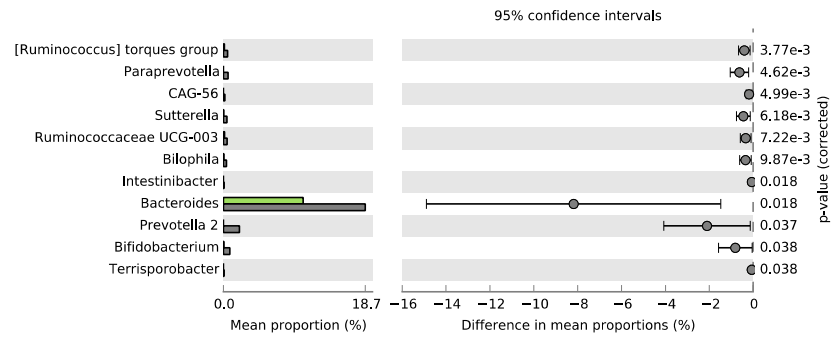

**B**

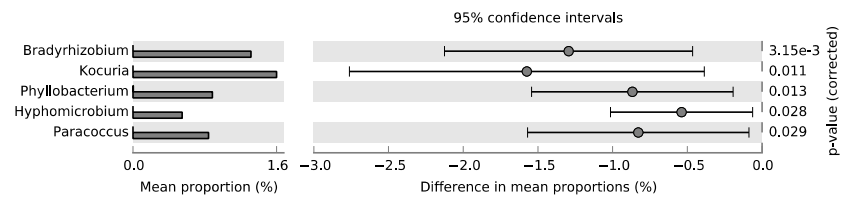

**Figure S2.** Relative changes of gut (A) or blood (B) bacterial taxa at the genus/family level in chronic kidney disease patients on peritoneal dialysis comparing adulthood (until 65 years old, grey bars) with seniorhood (> 65 years old, green bars) patients.
